# Supplementary material
Source: HighWire-hosted journal article supplement (https://bmjopenquality.bmj.com/content/7/4/e000192)
Supplement: inline-supplementary-material-2 [file inline-supplementary-material-2.docx]

| **No.** | **Action** | **Date** | **Notes** |
| --- | --- | --- | --- |
|  | **Actions for Project Author** | | |
| 1 | Production of pre- and post- test checklist cards (which double as information tools) | Jul 2016 | (Standard 2) |
| 2 | Provide list of notifiable diseases to HMP staff | Mar 2016 | For information |
| 3 | Provide BBV leaflets for wider distribution to prisoners and staff | Jul 2016 | (Standard 1,2) |
| 4 | Provide translated leaflets and in large print | Dec 2016 | (Standard 2) |
| 5 | Production of vaccination record cards | Dec 2016 | For prisoner use |
| 6 | Update Service Improvement Plan Tracker | Dec 2017 | From previous review |
| 7 | Future re-review | Dec 2018 |  |
|  | **Actions for HMP Birmingham Healthcare Staff** | | |
| 8 | Writing of a BBV policy | Dec 2016 | (Standard 1) |
| 9 | Weekly prisoner forums to include BBV information at frequent intervals | Jan 2016 | (Standard 1,2) |
| 10 | Involvement of drug services team in BBV service promotion/delivery | Dec 2016 | To assist with demand |
| 11 | Change the style of offer of BBV testing | Jan 2016 | To a proactive one |
| 12 | Offering vaccination at testing follow up and vice versa, and offer vaccination to all on admission | Jan 2016 | (Standard 3) |
| 13 | Recommendation for vaccination at bottom of negative test results letter | Jan 2016 | (Standard 3,4) |
| 14 | Mention of recommended 12 month and 5 year booster vaccine on notification to GP | Jan 2016 | (Standard 3,4) |
| 15 | Send PHE direct notifications of new BBV diagnoses | Jan 2016 |  |
| 16 | Measures to address the overbooking of prisoner appointments | Dec 2016 |  |
| 17 | Use of an ‘expert patient’ | Dec 2016 | (Standard 2) |
|  | **Actions for NHS England** | | |
| 18 | Include an advertisement of BBV services in email bulletin to prisoners | Dec 2016 | (Standard 1,2) |
| 19 | Assist with BBV policy | Dec 2016 | (Standard 1) |
| 20 | DBST training for all prison nurses | Dec 2016 | (Standard 2) |

**Action Plan Resulting from 2015 Review**
